# Supplementary material
Source: publisher figshare collection journal article supplement (https://gsajournals.figshare.com/articles/dataset/_/12130794)
Supplement: Supplementary file 1 [file 3]

# **The beginning of the end: a chromosomal assembly of the New World malaria mosquito ends with a novel telomere**

## **List of supplemental materials**

Tables S1: Repeat content of the two centromeric scaffolds

Tables S2: Repeat content of the AalbS2 and AalbS3 assemblies

Tables S3: BUSCO analysis of the AalbS2 and AalbS3 assemblies

Tables S4: Summary of heterozygosity

Tables S5: BLAST analysis using the FISH probes on the Hi-C and Bionano assemblies.

Figure S1: Heterozygosity plot

Figure S2: Fluorescence *in situ* hybridization on mitotic chromosomes

File S1: FASTA of representatives of the 120 bp centromeric repeat unit sequences and a AT-rich repeat found in one of the centromeric scaffolds

File S2: AalbS3 Repeat library

File S3: The 84 ONT long reads that begin or end with TRUs plus one chimeric read

**Table S1. Repeat content of the two centromeric scaffolds.** The two centromeric scaffolds consist most of repetitive DNA sequences, including tandem repeats of a 120 bp centromeric repeat unit (File S1), AT-repeats (File S1), and other repeats found in the repeat library (File S2).

| Name                | Total length | 120 bp centromeric Repeat Unit <sup>a</sup> | AT-repeat <sup>b</sup> | Repeat Library <sup>c</sup> | %masked <sup>d</sup> |
|---------------------|--------------|---------------------------------------------|------------------------|-----------------------------|----------------------|
| HiC_Centromere_chr2 | 334502       | 199427 (59.6%)                              | NA                     | 112030 (33.5%)              | 93.1                 |
| HiC_Centromere_chr3 | 957180       | 335045 (35%)                                | 149542 (15.6%)         | 338540 (35.4%)              | 86                   |

*a.* Number of bases (percentages) masked using 9 representatives of the 120 bp centromeric repeat unit (File S1). *b.* Number of bases (percentages) masked using a representative AT-rich sequence in the centromeric scaffold of chromosome 3 (File S1). *c.* Number of bases (percentages) masked by the AalBS3 repeat library (File S2). *d.* Total percentage of masked sequences in the scaffolds. Repeat masking was performed in a step-wise manner using libraries specified in 1-3, using default parameters.

**Table S2. Repeat content of the AalbS2 and AalbS3 assemblies.**

|                        | AalbS2 | AalbS3 |
|------------------------|--------|--------|
| Total Repeat Content   | 2.20%  | 5.06%  |
| SINEs                  | 0.01%  | 0.01%  |
| LINEs                  | 0.64%  | 0.83%  |
| LTR<br>retrotransposon | 0.16%  | 0.53%  |
| DNA elements           | 0.55%  | 1.31%  |
| Unclassified           | 0.84%  | 2.38%  |
| Simple repeats         | 0.26%  | 0.18%  |

Repeat masking was performed using the new repeat library (File S2) and default parameters.

**Table S3. BUSCO analysis of the AalbS2 and AalbS3 assemblies.**

| BUSCO<br>Classification     | AalbS2        |            | AalbS3        |            |
|-----------------------------|---------------|------------|---------------|------------|
|                             | Group<br>hits | Percentage | Group<br>hits | Percentage |
| Complete                    | 1055          | 98.9       | 1055          | 99.0       |
| Complete and<br>single-copy | 1046          | 98.1       | 1047          | 98.2       |
| Complete and<br>duplicated  | 9             | 0.8        | 8             | 0.8        |
| Fragmented                  | 3             | 0.3        | 4             | 0.4        |
| Missing                     | 8             | 0.8        | 7             | 0.6        |

**Table S4. Summary of heterozygosity**

|   | Mother      | Father      |
|---|-------------|-------------|
| X | 0.000373633 | 0.000731478 |
| 2 | 0.001091377 | 0.000908605 |
| 3 | 0.000803706 | 0.000944578 |

To estimate heterozygosity, Illumina reads from each of the parents were mapped to the AalbS3 assembly. Heterozygosity rates were calculated for each chromosome as the total number of heterozygous sites in a chromosome divided by the length of the chromosome excluding ambiguous N bases.

**Table S5. BLAST analysis using the FISH probes on the Hi-C and Bionano assemblies**

|   | Position | Order of FISH Probes | Probes Aligned to Hi-C Assembly | Probes Aligned to Bionano Assembly |
|---|----------|----------------------|---------------------------------|------------------------------------|
|   | 1A       | AALB006952           | AALB006952 AALB006952-RA        | AALB006952 AALB006952-RA           |
|   | 3A       | AALB006265           | AALB006265 AALB006265-RA        | AALB006265 AALB006265-RA           |
|   | 3A       | AALB007629           | AALB007629 AALB007629-RA        | AALB007629 AALB007629-RA           |
|   | 3C       | AALB007743           | AALB007743 AALB007743-RA        | AALB007743 AALB007743-RA           |
|   | 3C       | AALB015532           | AALB015532 AALB015532-RA        | AALB015532 AALB015532-RA           |
| X | 4A       | AALB003331           | AALB003331 AALB003331-RA        | AALB003331 AALB003331-RA           |
|   | 4A       | AALB007797           | AALB007797 AALB007797-RA        | AALB007797 AALB007797-RA           |
|   | 4C       | AALB007749           | AALB007749 AALB007749-RA        | AALB007749 AALB007749-RA           |
|   | 5A       | AALB003698           | AALB003698 AALB003698-RA        | AALB003698 AALB003698-RA           |
|   | 5A       | AALB003707           | AALB003707 AALB003707-RA        | AALB003707 AALB003707-RA           |
|   | 5A       | AALB009742           | AALB009742 AALB009742-RA        | AALB009742 AALB009742-RA           |
|   | 5B       | AALB009739           | AALB009739 AALB009739-RA        | AALB009739 AALB009739-RA           |
|   | 6A       | AALB009554           | AALB009554 AALB009554-RA        | AALB009554 AALB009554-RA           |
|   | 9A       | AALB008804           | AALB008804 AALB008804-RA        | AALB008804 AALB008804-RA           |
|   | 9A       | AALB002730           | AALB002730 AALB002730-RA        | AALB002730 AALB002730-RA           |
|   | 10B      | AALB002317           | AALB002317 AALB002317-RA        | AALB002317 AALB002317-RA           |
|   | 10C      | AALB007120           | AALB007120 AALB007120-RA        | AALB007120 AALB007120-RA           |

|   |     |            |                          |                          |
|---|-----|------------|--------------------------|--------------------------|
|   | 10C | AALB002315 | AALB002315 AALB002315-RA | AALB002315 AALB002315-RA |
|   | 11B | AALB002051 | AALB002051 AALB002051-RA | AALB002051 AALB002051-RA |
|   | 11B | AALB009555 | AALB009555 AALB009555-RA | AALB009555 AALB009555-RA |
|   | 12A | AALB009737 | AALB009737 AALB009737-RA | AALB009737 AALB009737-RA |
|   | 12A | AALB003905 | AALB003905 AALB003905-RA | AALB003905 AALB003905-RA |
|   | 12A | AALB003937 | AALB003937 AALB003937-RA | AALB003937 AALB003937-RA |
|   | 13A | AALB008464 | AALB008464 AALB008464-RA | AALB008464 AALB008464-RA |
| 2 | 13A | AALB008058 | AALB008058 AALB008058-RA | AALB008058 AALB008058-RA |
|   | 13A | AALB002941 | AALB002941 AALB002941-RA | AALB002941 AALB002941-RA |
|   | 13C | AALB003187 | AALB003187 AALB003187-RA | AALB003187 AALB003187-RA |
|   | 13C | AALB003689 | AALB003689 AALB003689-RA | AALB003689 AALB003689-RA |
|   | 14B | AALB003339 | AALB003339 AALB003339-RA | AALB003339 AALB003339-RA |
|   | 14B | AALB002796 | AALB002796 AALB002796-RA | AALB002796 AALB002796-RA |
|   | 14C | AALB002731 | AALB002731 AALB002731-RA | AALB002731 AALB002731-RA |
|   | 14C | AALB008768 | AALB008768 AALB008768-RA | AALB008768 AALB008768-RA |
|   | 15A | AALB008515 | AALB008515 AALB008515-RA | AALB008515 AALB008515-RA |
|   | 15A | AALB010878 | AALB010878 AALB010878-RA | AALB010878 AALB010878-RA |
|   | 15A | AALB002801 | AALB002801 AALB002801-RA | AALB002801 AALB002801-RA |
|   | 15B | AALB002940 | AALB002940 AALB002940-RA | AALB002940 AALB002940-RA |
|   | 15B | AALB008803 | AALB008803 AALB008803-RA | AALB008803 AALB008803-RA |

|  |     |            |                          |                          |
|--|-----|------------|--------------------------|--------------------------|
|  | 15C | AALB008770 | AALB008770 AALB008770-RA | AALB008770 AALB008770-RA |
|  | 15C | AALB001274 | AALB001274 AALB001274-RA | AALB001274 AALB001274-RA |
|  | 15C | AALB001290 | AALB001290 AALB001290-RA | AALB001290 AALB001290-RA |
|  | 16A | AALB007837 | AALB007837 AALB007837-RA | AALB007837 AALB007837-RA |
|  | 17B | AALB008049 | AALB008049 AALB008049-RA | AALB008049 AALB008049-RA |
|  | 17B | AALB001218 | AALB001218 AALB001218-RA | AALB001218 AALB001218-RA |
|  | 23B | AALB000001 | AALB000001 AALB000001-RA | AALB000001 AALB000001-RA |
|  | 23B | AALB002044 | AALB002044 AALB002044-RA | AALB002044 AALB002044-RA |
|  | 25B | AALB001296 | AALB001296 AALB001296-RA | AALB001296 AALB001296-RA |
|  | 26A | AALB003709 | AALB003709 AALB003709-RA | AALB003709 AALB003709-RA |
|  | 26B | AALB003876 | AALB003876 AALB003876-RA | AALB003876 AALB003876-RA |
|  | 26B | AALB009763 | AALB009763 AALB009763-RA | AALB009763 AALB009763-RA |
|  | 32A | AALB010862 | AALB010862 AALB010862-RA | AALB010862 AALB010862-RA |
|  | 32A | AALB004078 | Missing                  | AALB004078 AALB004078-RA |
|  | 32C | AALB003945 | AALB003945 AALB003945-RA | AALB003945 AALB003945-RA |
|  | 33A | AALB008507 | AALB008472 AALB008472-RA | AALB008472 AALB008472-RA |
|  | 32C | AALB008472 | AALB008507 AALB008507-RA | AALB008507 AALB008507-RA |
|  | 33B | AALB006953 | AALB007117 AALB007117-RA | AALB007117 AALB007117-RA |
|  | 33A | AALB007117 | AALB006953 AALB006953-RA | AALB006953 AALB006953-RA |
|  | 33B | AALB007443 | AALB007443 AALB007443-RA | AALB007443 AALB007443-RA |



|   |     |            |                          |                          |
|---|-----|------------|--------------------------|--------------------------|
| 3 | 33C | AALB007353 | AALB007353 AALB007353-RA | AALB007353 AALB007353-RA |
|   | 33C | AALB003893 | AALB003893 AALB003893-RA | AALB003893 AALB003893-RA |
|   | 34A | AALB003904 | Missing                  | AALB003904 AALB003904-RA |
|   | 34A | AALB007568 | AALB007568 AALB007568-RA | AALB007568 AALB007568-RA |
|   | 34B | AALB007622 | AALB007622 AALB007622-RA | AALB007622 AALB007622-RA |
|   | 35A | AALB001253 | AALB001253 AALB001253-RA | AALB001253 AALB001253-RA |
|   | 35A | AALB007555 | AALB007555 AALB007555-RA | AALB007555 AALB007555-RA |
|   | 35B | AALB007448 | AALB007448 AALB007448-RA | AALB007448 AALB007448-RA |
|   | 35B | AALB014716 | AALB014360 AALB014360-RA | AALB014360 AALB014360-RA |
|   | 36A | AALB007835 | AALB009746 AALB009746-RA | AALB009746 AALB009746-RA |
|   | 36B | AALB014360 | AALB009753 AALB009753-RA | AALB009753 AALB009753-RA |
|   | 35B | AALB009746 | AALB007835 AALB007835-RA | AALB007835 AALB007835-RA |
|   | 35B | AALB009753 | AALB014716 AALB014716-RA | AALB014716 AALB014716-RA |
|   | 36B | AALB007293 | Missing                  | AALB007293 AALB007293-RA |
|   | 36B | AALB007352 | AALB007352 AALB007352-RA | AALB007352 AALB007352-RA |
|   | 37A | AALB003188 | Missing                  | AALB003188 AALB003188-RA |
|   | 38A | AALB003282 | AALB003282 AALB003282-RA | AALB003282 AALB003282-RA |
|   | 38A | AALB004081 | AALB004081 AALB004081-RA | AALB004081 AALB004081-RA |
|   | 45B | AALB006259 | AALB006259 AALB006259-RA | AALB006259 AALB006259-RA |



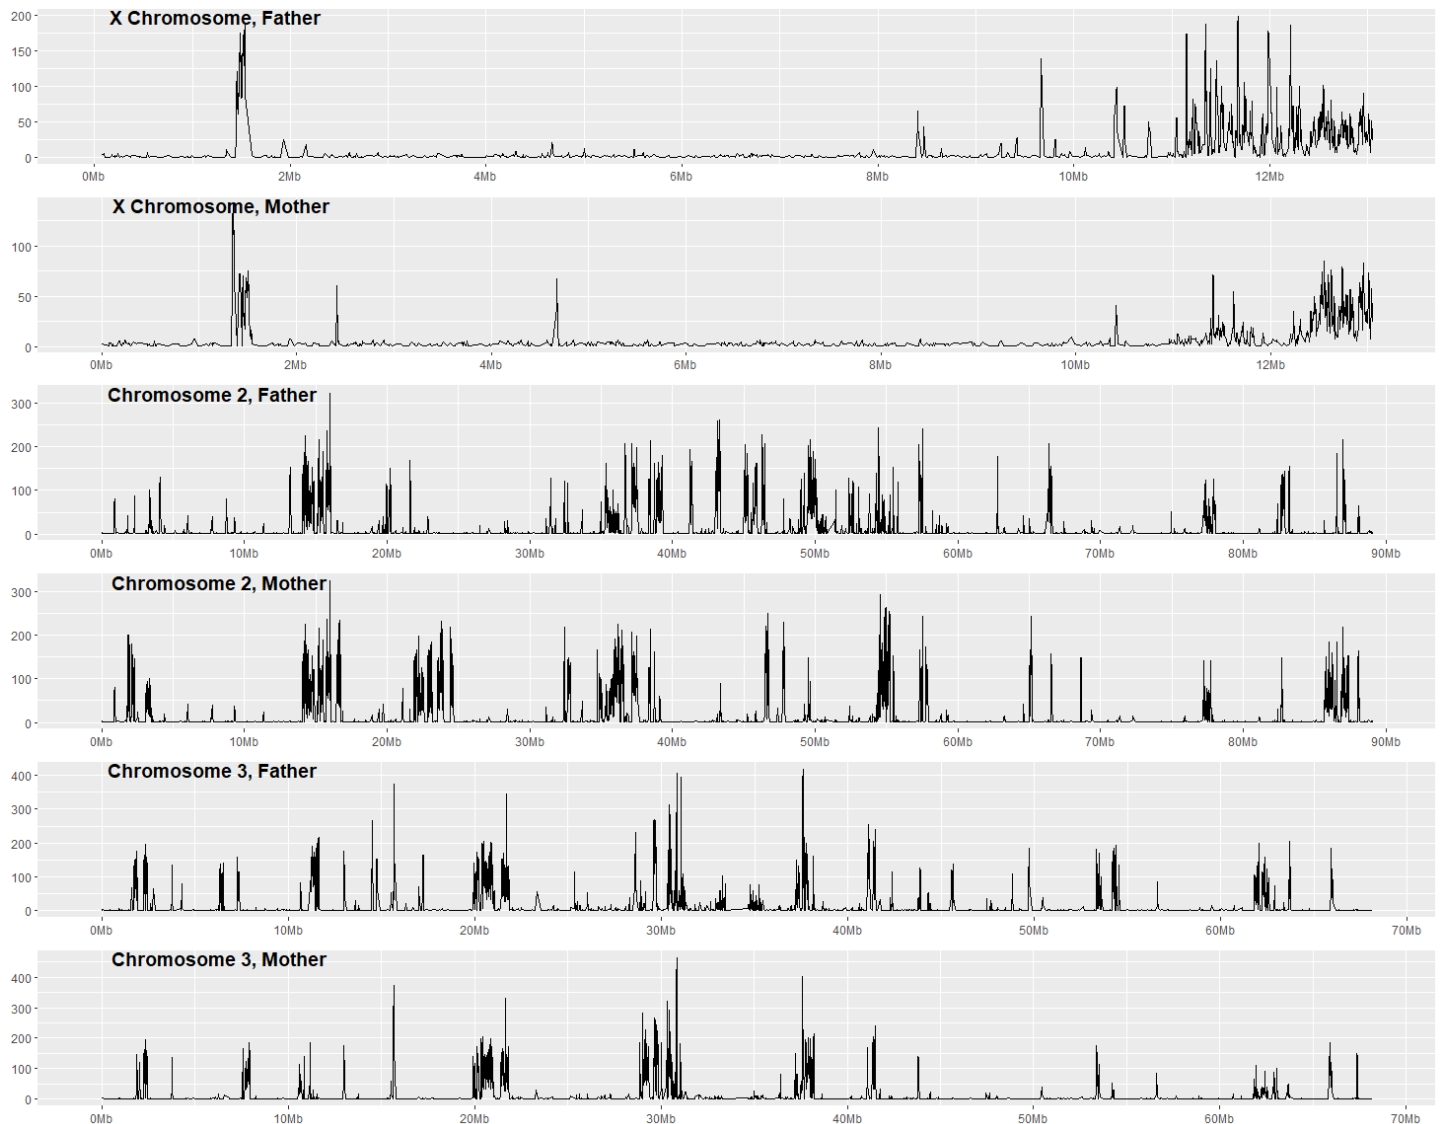

**Figure S1. Heterozygosity plot.** X-axis is the position along the chromosomes. Y-axis is the number of heterozygous sites per 10 kilobase window. Although the overall heterozygosity is very low, there are clusters of relatively high heterozygosity along each chromosome in both parents.

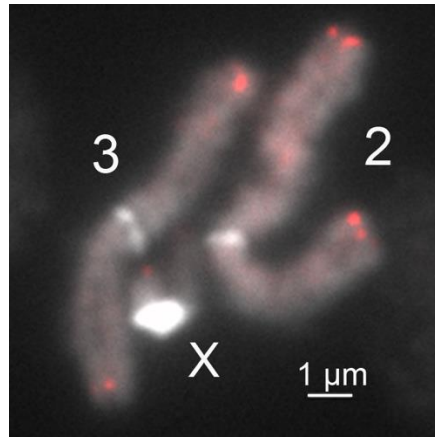

**Figure S2.** Fluorescence *in situ* hybridization and mapping of the *An. albimanus* telomeric oligonucleotide probe on mitotic chromosomes from the 4th instar larva. The figure shows closely paired homologous chromosomes at the early metaphase stage. Chromosomes hybridized with Cy3-labeled oligonucleotide probe (red) and counterstained with the fluorophore DAPI (white). Chromosome arms are labeled as X, 2, and 3; Scale bar – 1 μm.
